# Supplementary material
Source: Springer Nature journal article supplement (https://www.springermedizin.de/resource/supplementary/12955_2013_1344_MOESM2_ESM.pdf/9559594)

■ No problem    ◆ Some problems    ● Cannot perform

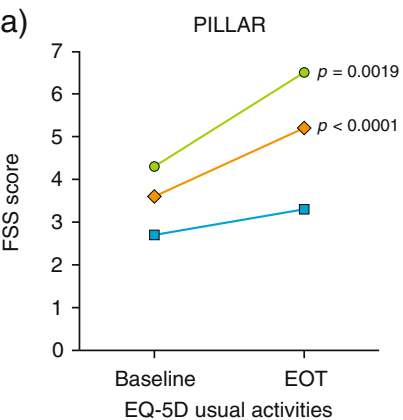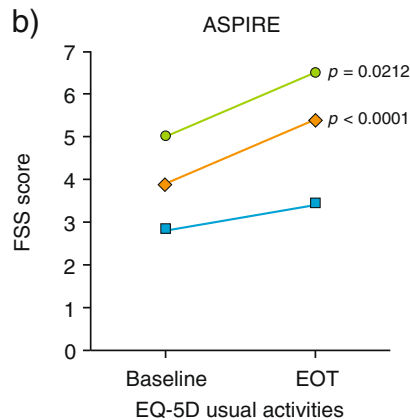

■ Case    ◆ Control

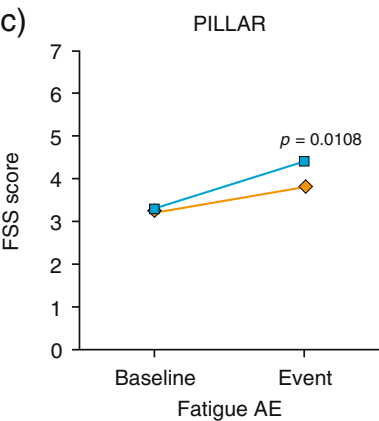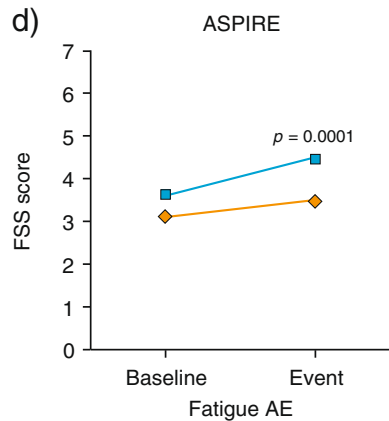

Supplement: MOESM2 [file 9559594]
